# Supplementary material for: Patient pain during intravitreal injections under topical anesthesia: a systematic review
Source: PubMed Central journal article supplement (PMC5494853; doi:10.1186/s40942-017-0076-9), 2017-07-03
Supplement: 40942_2017_76_MOESM1_ESM.pdf [file 40942_2017_76_MOESM1_ESM.pdf]

**S1 Table.** Database search strategy.

| Databases                                                           | Search Strategy                                                                                                                                                                                                                                                                |
|---------------------------------------------------------------------|--------------------------------------------------------------------------------------------------------------------------------------------------------------------------------------------------------------------------------------------------------------------------------|
| Cochrane, LILACS, PubMed, Scopus,<br>Web of Science, Google Scholar | (INTRAVITREAL INJECTION) AND<br>(ANESTHESIA OR LIDOCAINE OR<br>PROXYMETACAINE OR<br>PROPARACAINE OR TETRACAINE<br>OR TOPICAL OR GEL) AND<br>("ANTIANGIOGENIC AGENTS" OR<br>BEVACIZUMAB OR RANIBIZUMAB OR<br>AFLIBERCEPT OR TRIAMCINOLONE<br>OR CORTICOIDS OR<br>DEXAMETHASONE) |
